# Supplementary material
Source: PubMed Central journal article supplement (PMC8514279)
Supplement: 586_2021_7019_MOESM1_ESM.pdf [file 586_2021_7019_MOESM1_ESM.pdf]

# **Versão em Português Brasileiro do Neck Disability Index com 5 itens**

Este questionário foi criado para nos dar informações sobre como a sua dor no pescoço tem afetado a sua habilidade para fazer as atividades diárias. Por favor, responda a cada uma das perguntas e marque em cada seção apenas uma alternativa que melhor se aplica a você.

## **1 – Cuidados pessoais (lavar-se, vestir-se, etc.)**

- ☐ Eu posso cuidar de mim mesmo(a) sem aumentar a dor.
- ☐ Eu posso cuidar de mim mesmo(a) normalmente, mas isso faz aumentar a dor.
- ☐ É doloroso ter que cuidar de mim mesmo(a) e eu faço isso lentamente e com cuidado.
- ☐ Eu preciso de ajuda, mas consigo fazer a maior parte dos meus cuidados pessoais.
- ☐ Eu preciso de ajuda na maioria dos aspectos relacionados a cuidar de mim mesmo(a).
- ☐ Eu não me visto, me lavo com dificuldade e fico na cama.

## **2 – Prestar atenção**

- ☐ Eu consigo prestar atenção quando quero sem dificuldade.
- ☐ Eu consigo prestar atenção quando quero com uma dificuldade leve.
- ☐ Eu tenho dificuldade moderada em prestar atenção quando quero.
- ☐ Eu tenho muita dificuldade em prestar atenção quando quero.
- ☐ Eu tenho muitíssima dificuldade em prestar atenção quando quero.
- ☐ Eu não consigo prestar atenção.

## **3 – Trabalho**

- ☐ Eu posso trabalhar tanto quanto quiser.
- ☐ Eu só consigo fazer o trabalho a que estou acostumado(a) a fazer, mas nada além disso.
- ☐ Eu consigo fazer a maior parte do trabalho a que estou acostumado(a) a fazer, mas nada além disso.
- ☐ Eu não consigo fazer o trabalho a que estou acostumado(a) a fazer.
- ☐ Eu mal consigo fazer qualquer tipo de trabalho.
- ☐ Eu não consigo fazer nenhum tipo de trabalho.

## **4 – Dirigir automóveis**

- ☐ Eu posso dirigir meu carro sem nenhuma dor no pescoço.
- ☐ Eu posso dirigir meu carro tanto quanto eu quero com uma dor leve no meu pescoço.
- ☐ Eu posso dirigir meu carro tanto quanto eu quero com uma dor moderada no meu pescoço.
- ☐ Eu não posso dirigir o meu carro tanto quanto eu quero por causa de uma dor moderada no meu pescoço.
- ☐ Eu mal posso dirigir por causa de uma dor forte no meu pescoço.
- ☐ Eu não posso dirigir meu carro de maneira nenhuma.

## **5 – Diversão**

- ☐ Eu consigo fazer todas as minhas atividades de diversão sem nenhuma dor no pescoço.
- ☐ Eu consigo fazer todas as minhas atividades de diversão com alguma dor no pescoço.
- ☐ Eu consigo fazer a maioria, mas não todas as minhas atividades de diversão por causa da dor no meu pescoço.
- ☐ Eu consigo fazer poucas das minhas atividades de diversão por causa da dor no meu pescoço.
- ☐ Eu mal consigo fazer qualquer atividade de diversão por causa da dor no meu pescoço.
- ☐ Eu não consigo fazer nenhuma atividade de diversão.
